# Supplementary material for: Integrated mental health care in a multidisciplinary maternal and child health service in the community: the findings from the Suzaka trial
Source: PubMed Central journal article supplement (PMC6364479; doi:10.1186/s12884-019-2179-9), 2019-02-06
Supplement: 12884_2019_2179_MOESM5_ESM.pdf [file 12884_2019_2179_MOESM5_ESM.pdf]

**Additional file 5. The results of the psychosocial questionnaire of the intervention group's participants at T1**

|                                   | Missing | Number |                                                                                | Missing | Number |
|-----------------------------------|---------|--------|--------------------------------------------------------------------------------|---------|--------|
| Number of the family living with  |         |        | Practical supports during pregnancy and after delivery                         | 2       |        |
| 1                                 |         | 61     | Yes                                                                            |         | 208    |
| 2                                 |         | 67     | No                                                                             |         | 2      |
| 3                                 |         | 40     | Partner's emotional supports                                                   | 2       |        |
| 4                                 |         | 21     | Yes                                                                            |         | 202    |
| 5                                 |         | 12     | No                                                                             |         | 2      |
| 6                                 |         | 5      | Mother's emotional supports                                                    | 4       |        |
| 7                                 |         | 4      | Yes                                                                            |         | 197    |
| Persons who live with             |         |        | No                                                                             |         | 3      |
| partner                           | 1       | 205    | Neither                                                                        |         | 6      |
| child                             |         |        | Others' emotional supports                                                     | 4       |        |
| 0                                 |         | 91     | Yes                                                                            |         | 194    |
| 1                                 |         | 84     | No                                                                             |         | 12     |
| 2                                 |         | 25     | Experience of misbirth, stillbirth, or baby death within a year after delivery | 2       |        |
| 3 or more                         |         | 10     | Yes                                                                            |         | 48     |
| partner's father                  |         | 26     | No                                                                             |         | 160    |
| partner's mother                  |         | 33     | For those who have an experience of delivery                                   |         |        |
| mother                            |         | 25     | How had your condition been during antenatal and postnatal periods?            | 85      |        |
| father                            | 1       | 19     | well                                                                           |         | 86     |
| siblings                          |         |        | irritated                                                                      |         | 16     |
| 0                                 |         | 196    | felt anxiety                                                                   |         | 12     |
| 1                                 |         | 10     | depressed                                                                      |         | 3      |
| 2 or more                         |         | 4      | felt sick                                                                      |         | 1      |
| others                            |         | 15     | others                                                                         |         | 7      |
| Smoking                           |         |        | Have you ever had some physical or fertile problems during pregnancy?          | 88      |        |
| Non-smoker also before pregnancy  |         | 169    | Yes                                                                            |         | 21     |
| Stopped after pregnancy           |         | 37     | No                                                                             |         | 101    |
| Yes                               |         | 4      | How do you feel when you knew you had become pregnant?                         | 4       |        |
| Drinking                          | 1       |        | very happy                                                                     |         | 142    |
| Non-drinker also before pregnancy |         | 104    | unexpected but happy                                                           |         | 56     |

|               |                         |        |                                                              |          |
|---------------|-------------------------|--------|--------------------------------------------------------------|----------|
|               | Stopped after pregnancy | 105    | unexpected and confused                                      | 5        |
| Medication    | 4                       |        | baffled                                                      | 2        |
|               | Yes                     | 24     | others                                                       | 1        |
|               | No                      | 182    | Past psychiatric treatment history                           | 37       |
| Height        |                         | 157.83 | Yes                                                          | 13       |
| Body weight   |                         | 51.46  | No                                                           | 160      |
| BMI           |                         | 20.5   | Past physical illness treatment history except for pregnancy | 37       |
| Economic funk | 4                       |        | Yes                                                          | 17       |
|               | Yes                     | 68     | No                                                           | 156      |
|               | No                      | 138    | Mean                                                         | SD       |
|               |                         |        | EPDS total score                                             | 3.7 2.83 |

EPDS indicates Edinburgh Postnatal Depression Scale. SD indicates standard deviation.
